# Supplementary material
Source: PubMed Central journal article supplement (PMC7546197)
Supplement: mmc1.pdf [file mmc1.pdf]

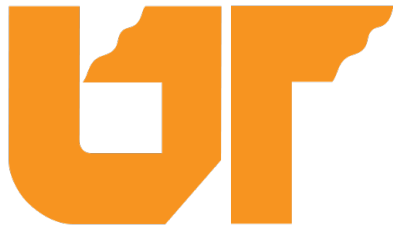

THE UNIVERSITY OF  
**TENNESSEE**  
HEALTH SCIENCE CENTER™

## Applicant Survey

Dear Applicants:

You are being asked to participate in a research study. Please contact Dr. Ankush Gosain, the principal investigator, at (901) 287-6031 if you have questions about this research study.

The purpose of this study is to learn more about your experience in the fellowship match process with Le Bonheur Children's Hospital and how virtual interviews affect the fellowship interview process.

This study involves answering a series of questions and that it should take about 3-5 minutes to answer the questions. You may tire from answering questions or feel uncomfortable when answering sensitive questions.

This study will help researchers learn more about how the virtual interview option has impacted the experience of potential candidates. There will be no direct benefit to you for participating in this study.

Your participation is voluntary and if you choose to not participate or to stop participating at any time, your decision will not result in a penalty or affect your rights.

Your responses to this survey will be collected anonymously and will not be connected to your email address.

You may contact Cameron Barclay, MSA, UTHSC IRB Director, at 901-448-4824, or visit the IRB website at <http://www.uthsc.edu/research/compliance/irb/> if you have any questions about your rights as a research subject, or if you have questions, concerns, or complaints about the research.

Thank you very much for your time and support. By continuing, you consent to participate in this study. Please start with the survey now by clicking on the Next button below.

Were any of your interviews for Pediatric Surgery fellowship cancelled, rescheduled or converted to a virtual format due to COVID-19?

- No
- Yes, at least one interview was cancelled or rescheduled due to COVID-19, but none were converted to a virtual format
- Yes, I had interviews cancelled and/or rescheduled and had at least one interview was converted to a virtual format due to COVID-19
- Yes, while none of my interviews were cancelled or rescheduled, I had at least one interview that was converted to a virtual format due to COVID-19

Did you prefer virtual or in-person interviews overall?

- Virtual
- In-Person
- No preference

On a scale of 1-10, how well did you feel you got to know the program when you attended

|                      | Not at all            |                       |                       |                       |                       |                       |                       |                       | Very Well             |                       |
|----------------------|-----------------------|-----------------------|-----------------------|-----------------------|-----------------------|-----------------------|-----------------------|-----------------------|-----------------------|-----------------------|
|                      | 1                     | 2                     | 3                     | 4                     | 5                     | 6                     | 7                     | 8                     | 9                     | 10                    |
| In-Person Interview? | <input type="radio"/> |
| Virtual Interview?   | <input type="radio"/> |

On a scale of 1-10, how much of an effect did the interview type have on your final rank list?

|           | Very Unlikely         |                       |                       |                       |                       |                       |                       | Highly Likely         |                       |                       |
|-----------|-----------------------|-----------------------|-----------------------|-----------------------|-----------------------|-----------------------|-----------------------|-----------------------|-----------------------|-----------------------|
|           | 1                     | 2                     | 3                     | 4                     | 5                     | 6                     | 7                     | 8                     | 9                     | 10                    |
| Rank List | <input type="radio"/> |

On a scale of 1-10, how likely are you to recommend virtual interviews for future pediatric surgery match years?

|                           | Not Likely            |                       |                       |                       |                       |                       |                       | Very Likely           |                       |                       |
|---------------------------|-----------------------|-----------------------|-----------------------|-----------------------|-----------------------|-----------------------|-----------------------|-----------------------|-----------------------|-----------------------|
|                           | 1                     | 2                     | 3                     | 4                     | 5                     | 6                     | 7                     | 8                     | 9                     | 10                    |
| As a complete replacement | <input type="radio"/> |

|                                                                                                      | Not Likely            |                       |                       |                       |                       |                       |                       |                       | Very Likely           |                       |
|------------------------------------------------------------------------------------------------------|-----------------------|-----------------------|-----------------------|-----------------------|-----------------------|-----------------------|-----------------------|-----------------------|-----------------------|-----------------------|
|                                                                                                      | 1                     | 2                     | 3                     | 4                     | 5                     | 6                     | 7                     | 8                     | 9                     | 10                    |
| As an option (applicants are given the choice)                                                       | <input type="radio"/> |
| As a screening tool (after which, applicants and programs can decide regarding in-person interviews) | <input type="radio"/> |

For the top five choices of your final rank list, in which type of interview did you participate?

|            | Virtual               | In-Person             | N/A                   |
|------------|-----------------------|-----------------------|-----------------------|
| 1st Choice | <input type="radio"/> | <input type="radio"/> | <input type="radio"/> |
| 2nd Choice | <input type="radio"/> | <input type="radio"/> | <input type="radio"/> |
| 3rd Choice | <input type="radio"/> | <input type="radio"/> | <input type="radio"/> |
| 4th Choice | <input type="radio"/> | <input type="radio"/> | <input type="radio"/> |
| 5th Choice | <input type="radio"/> | <input type="radio"/> | <input type="radio"/> |

If you are willing to share, how much money did you spend on the entire application process, including applications, travel for interviews, etc?

- \$0-2,500
- \$2,501-5,000
- \$5,001-7,500
- \$7,501-10,000
- \$10,001-15,000
- \$15,001-20,000
- \$20,000+
- Preference not to say

Did you interview at Le Bonheur Children's Hospital?

- Yes
- No

For your Le Bonheur Children's Hospital interview, did you participate in an in-person or virtual interview?

- In-Person
- Virtual

On a scale of 1-10, how user friendly was the Zoom format with breakout sessions?

|             | Not at all User Friendly |                       |                       |                       |                       |                       |                       | Very User Friendly    |                       |                       |
|-------------|--------------------------|-----------------------|-----------------------|-----------------------|-----------------------|-----------------------|-----------------------|-----------------------|-----------------------|-----------------------|
|             | 1                        | 2                     | 3                     | 4                     | 5                     | 6                     | 7                     | 8                     | 9                     | 10                    |
| Zoom Format | <input type="radio"/>    | <input type="radio"/> | <input type="radio"/> | <input type="radio"/> | <input type="radio"/> | <input type="radio"/> | <input type="radio"/> | <input type="radio"/> | <input type="radio"/> | <input type="radio"/> |

Did you experience any technical difficulties?

- Yes
- No

On a scale of 1-10, how useful did you find the hospital tour?

|               | Not at all useful     |                       |                       |                       |                       |                       |                       |                       | Very Useful           |                       | N/A                   |
|---------------|-----------------------|-----------------------|-----------------------|-----------------------|-----------------------|-----------------------|-----------------------|-----------------------|-----------------------|-----------------------|-----------------------|
|               | 1                     | 2                     | 3                     | 4                     | 5                     | 6                     | 7                     | 8                     | 9                     | 10                    | N/A                   |
| Hospital Tour | <input type="radio"/> |

On a scale of 1-10, what was your overall satisfaction with your interview at Le Bonheur Children's Hospital?

|                      | Highly Dissatisfied   |                       |                       |                       |                       |                       |                       | Highly Satisfied      |                       |                       |
|----------------------|-----------------------|-----------------------|-----------------------|-----------------------|-----------------------|-----------------------|-----------------------|-----------------------|-----------------------|-----------------------|
|                      | 1                     | 2                     | 3                     | 4                     | 5                     | 6                     | 7                     | 8                     | 9                     | 10                    |
| Overall Satisfaction | <input type="radio"/> |

On a scale of 1-10, please rate your satisfaction with the following

|                        | Highly Dissatisfied   |                       |                       |                       |                       |                       |                       | Highly Satisfied      |                       |                       | N/A                   |
|------------------------|-----------------------|-----------------------|-----------------------|-----------------------|-----------------------|-----------------------|-----------------------|-----------------------|-----------------------|-----------------------|-----------------------|
|                        | 1                     | 2                     | 3                     | 4                     | 5                     | 6                     | 7                     | 8                     | 9                     | 10                    | N/A                   |
| Social Events (dinner) | <input type="radio"/> |

|                                                                      | Highly Dissatisfied   |                       |                       |                       |                       |                       |                       | Highly Satisfied      |                       |                       | N/A                   |
|----------------------------------------------------------------------|-----------------------|-----------------------|-----------------------|-----------------------|-----------------------|-----------------------|-----------------------|-----------------------|-----------------------|-----------------------|-----------------------|
|                                                                      | 1                     | 2                     | 3                     | 4                     | 5                     | 6                     | 7                     | 8                     | 9                     | 10                    |                       |
| Meals on Interview Day                                               | <input type="radio"/> |
| Interview Process                                                    | <input type="radio"/> |
| Program Overview                                                     | <input type="radio"/> |
| Hospital Tour                                                        | <input type="radio"/> |
| Interaction with Current Fellows                                     | <input type="radio"/> |
| Interaction with Faculty                                             | <input type="radio"/> |
| Interaction with other team members (NPs, administrative assistants) | <input type="radio"/> |

On a scale of 1-10, did you feel you adequately had all of your questions answered when you interacted with the following?

|                                                     | Highly Dissatisfied   |                       |                       |                       |                       |                       |                       | Highly Satisfied      |                       |                       |
|-----------------------------------------------------|-----------------------|-----------------------|-----------------------|-----------------------|-----------------------|-----------------------|-----------------------|-----------------------|-----------------------|-----------------------|
|                                                     | 1                     | 2                     | 3                     | 4                     | 5                     | 6                     | 7                     | 8                     | 9                     | 10                    |
| Faculty                                             | <input type="radio"/> |
| Current Fellows                                     | <input type="radio"/> |
| Other team members (NPs, administrative assistants) | <input type="radio"/> |

If you participated in a virtual interview, do you have any additional comments or suggestions for improving the virtual interview if done in the future?
