# Supplementary material
Source: PubMed Central journal article supplement (PMC7546197)
Supplement: mmc2.pdf [file mmc2.pdf]

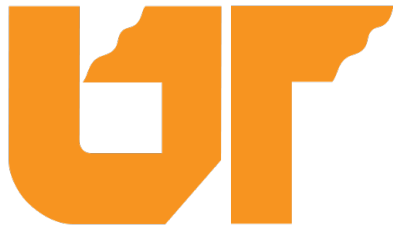

THE UNIVERSITY OF  
**TENNESSEE**  
HEALTH SCIENCE CENTER™

## Faculty Survey

A large, empty light gray rectangular area, likely a placeholder for survey content or a redacted section.

Hello:

You are being asked to participate in a research study. Please contact Dr. Ankush Gosain, the principal investigator, at (901)287-6031 if you have questions about this research study.

The purpose of this study is to learn more about your experience in the fellowship match process with Le Bonheur Children's Hospital and how virtual interviews affect the fellowship interview process.

This study involves answering a series of questions and that it should take about 3-5 minutes to answer the questions.

You may tire from answering questions or feel uncomfortable when answering sensitive questions.

This study will help researchers learn more about how the virtual interview option has impacted the experience of potential candidates. There will be no direct benefit to you for participating in this study.

Your participation is voluntary and if you choose to not participate or to stop participating at any time, your decision will not result in a penalty or affect your rights.

Your responses to this survey will be collected anonymously and will not be connected to your email address.

You may contact Cameron Barclay, MSA, UTHSC IRB Director, at 901-448-4824, or visit the IRB website at <http://www.uthsc.edu/research/compliance/irb/> if you have any questions about your rights as a research subject, or if you have questions, concerns, or complaints about the research.

Thank you very much for your time and support. By continuing, you consent to participate in this study. Please start with the survey now by clicking on the Next button below.

On a scale of 1 to 10, how well did you feel you got to know the applicants when you conducted an in-person interview?

|   |   |   |   |   |   |   |   |   |    |
|---|---|---|---|---|---|---|---|---|----|
| 1 | 2 | 3 | 4 | 5 | 6 | 7 | 8 | 9 | 10 |
|---|---|---|---|---|---|---|---|---|----|

Not at all

Very Well

On a scale of 1 to 10, how well did you feel you got to know the applicants when you conducted a virtual interview?

|   |   |   |   |   |   |   |   |   |    |
|---|---|---|---|---|---|---|---|---|----|
| 1 | 2 | 3 | 4 | 5 | 6 | 7 | 8 | 9 | 10 |
|---|---|---|---|---|---|---|---|---|----|

Not at all

Very Well

On a scale of 1-10, did interview type influence how likely you were to rank an applicant highly?

|   |   |   |   |   |   |   |   |   |    |
|---|---|---|---|---|---|---|---|---|----|
| 1 | 2 | 3 | 4 | 5 | 6 | 7 | 8 | 9 | 10 |
|---|---|---|---|---|---|---|---|---|----|

No influence

Highly influenced

Did you prefer virtual or in-person interviews overall?

|   |   |   |   |   |   |   |   |   |    |
|---|---|---|---|---|---|---|---|---|----|
| 1 | 2 | 3 | 4 | 5 | 6 | 7 | 8 | 9 | 10 |
|---|---|---|---|---|---|---|---|---|----|

Virtual

In-Person

On a scale of 1-10, how likely are you to recommend virtual interviews as a complete replacement for interviews for future pediatric surgery match years?

|   |   |   |   |   |   |   |   |   |    |
|---|---|---|---|---|---|---|---|---|----|
| 1 | 2 | 3 | 4 | 5 | 6 | 7 | 8 | 9 | 10 |
|---|---|---|---|---|---|---|---|---|----|

Do Not Recommend

Highly Recommend

On a scale of 1-10, how likely are you to recommend virtual interviews as an option for interviews for future pediatric surgery match years? In this scenario, applicants would be given the option of interviewing in-person or virtually.

|   |   |   |   |   |   |   |   |   |    |
|---|---|---|---|---|---|---|---|---|----|
| 1 | 2 | 3 | 4 | 5 | 6 | 7 | 8 | 9 | 10 |
|---|---|---|---|---|---|---|---|---|----|

Do Not Recommend

Highly Recommend

On a scale of 1-10, how likely are you to recommend virtual interviews as a screening tool for future pediatric surgery match years? In this scenario, applicants and programs would decide afterwards if an in-person interview was desired.

|   |   |   |   |   |   |   |   |   |    |
|---|---|---|---|---|---|---|---|---|----|
| 1 | 2 | 3 | 4 | 5 | 6 | 7 | 8 | 9 | 10 |
|---|---|---|---|---|---|---|---|---|----|

Do Not Recommend

Highly Recommend
